# Supplementary material
Source: publisher figshare collection journal article supplement (https://sage.figshare.com/ndownloader/files/18667418)
Supplement: Supplementary file 1 [file 18667418]

**Supplemental Material**

*Supplemental Table 1. Complete Ordinal Logistic Regression Parameter Estimates for Primary Analyses with Individual Indicators*

| **Predictor** | | **Estimate** | **SE** | **95% CI** | **Wald’s χ2** | ***p-*value** | **Odds Ratio**  **(raw units)** |
| --- | --- | --- | --- | --- | --- | --- | --- |
|  | **HDL** | | | | | |  |
|  | Model of Self-Awareness | | | | | |  |
| Male | | -0.53 | .12 | -0.77, -0.33 | 20.46 | <.001 | 0.59 |
| <5 GCSE equivalent | | -0.86 | .17 | -1.19, -0.53 | 26.18 | <.001 | 0.42 |
| 5 GCSE equivalent | | -0.46 | .16 | -0.77, -0.16 | 8.95 | .003 | 0.63 |
| A-Level equivalent | | -0.28 | .19 | -0.65, 0.09 | 2.16 | .142 | 0.76 |
| Non-White Dummy Indicator | | 0.41 | .16 | 0.09, 0.73 | 6.36 | .012 | 1.51 |
| Non-Pakistani Dummy Indicator | | -0.37 | .16 | -0.67, -0.06 | 5.58 | .018 | 0.69 |
| Maternal Age | | 0.00 | .00 | 0.00, 0.00 | 1.72 | .190 | 1.00 |
| Cord HDL | | 0.65 | .26 | 0.14, 1.16 | 6.23 | .013 | 1.92 |
|  | Model of Emotion Regulation | | | | | |  |
| Male | | -0.86 | .12 | -1.10, -0.62 | 49.47 | <.001 | 0.42 |
| <5 GCSE equivalent | | -1.11 | .17 | -1.45, -0.77 | 41.03 | <.001 | 0.33 |
| 5 GCSE equivalent | | -0.69 | .16 | -1.01, -0.38 | 18.96 | <.001 | 0.50 |
| A-Level equivalent | | -0.44 | .19 | -0.82, -0.06 | 5.23 | .002 | 0.64 |
| Non-White Dummy Indicator | | 0.31 | .17 | 0.64, 3.50 | 3.50 | .061 | 1.36 |
| Non-Pakistani Dummy Indicator | | -0.34 | .16 | -0.65, -0.03 | 4.74 | .029 | 0.71 |
| Maternal Age | | 0.00 | .00 | 0.00, 0.00 | 5.40 | .020 | 1.00 |
| Cord HDL | | 0.73 | .26 | 0.21, 1.25 | 7.62 | .006 | 2.08 |
|  | Model of Interpersonal Relationship | | | | | |  |
| Male | | -0.71 | .12 | -0.95, -0.47 | 33.69 | <.001 | 0.49 |
| <5 GCSE equivalent | | -1.09 | .18 | -1.43, -0.75 | 38.91 | <.001 | 0.34 |
| 5 GCSE equivalent | | -0.70 | .16 | -1.021, -0.37 | 18.89 | <.001 | 0.50 |
| A-Level equivalent | | -0.45 | .20 | -0.84, -0.07 | 5.33 | .021 | 0.64 |
| Non-White Dummy Indicator | | 0.44 | .17 | 0.11, 0.77 | 8.92 | .009 | 1.56 |
| Non-Pakistani Dummy Indicator | | -0.27 | .16 | -0.58, 0.05 | 2.76 | .097 | 0.77 |
| Maternal Age | | 0.00 | .00 | 0.00, 0.00 | 9.22 | .093 | 1.00 |
| Cord HDL | | 0.82 | .27 | 0.29, 1.34 | 9.22 | .002 | 2.26 |
|  | **LDL** | | | | | |  |
|  | Model of Self-Awareness | | | | | |  |
| Male | | -0.56 | 1.12 | -0.79, -0.34 | 23.78 | <.001 | 0.57 |
| <5 GCSE equivalent | | -0.86 | .17 | -1.21, -0.55 | 27.11 | <.001 | 0.42 |
| 5 GCSE equivalent | | -0.47 | .16 | -0.78, -0.17 | 9.21 | .002 | 0.62 |
| A-Level equivalent | | -0.28 | .19 | -0.65, 0.09 | 2.20 | .138 | 0.76 |
| Non-White Dummy Indicator | | 0.46 | .16 | 0.13, 0.78 | 7.67 | .006 | 1.58 |
| Non-Pakistani Dummy Indicator | | -0.36 | .16 | -0.66, -0.05 | 5.25 | .002 | 0.70 |
| Maternal Age | | 0.00 | .00 | 0.00, 0.00 | 1.37 | .243 | 1.00 |
| Cord LDL | | -1.17 | .48 | -2.11, -0.24 | 6.04 | .014 | 0.31 |
|  | Model of Emotion Regulation | | | | | |  |
| Male | | -0.90 | .12 | -1.13, -0.66 | 54.96 | <.001 | 0.41 |
| <5 GCSE equivalent | | -1.12 | .17 | -1.46, -0.78 | 41.97 | <.001 | 0.33 |
| 5 GCSE equivalent | | -0.70 | .16 | -1.01, -0.39 | 19.25 | <.001 | 0.50 |
| A-Level equivalent | | -0.44 | .19 | -0.81, -0.06 | 5.10 | .024 | 0.65 |
| Non-White Dummy Indicator | | 0.35 | .17 | 0.02, 0.68 | 4.33 | .038 | 1.42 |
| Non-Pakistani Dummy Indicator | | -0.44 | .16 | -0.64, -0.03 | 4.48 | .034 | 0.72 |
| Maternal Age | | 0.00 | .00 | 0.00, 0.00 | 4.68 | .031 | 1.00 |
| Cord LDL | | -1.13 | .48 | -2.07, -0.20 | 5.62 | .018 | 0.32 |
|  | Model of Interpersonal Relationship | | | | | |  |
| Male | | -0.75 | .12 | -0.99, -0.52 | 38.74 | <.001 | 0.47 |
| <5 GCSE equivalent | | -1.11 | .18 | -1.45, -0.77 | 40.11 | <.001 | 0.33 |
| 5 GCSE equivalent | | -0.71 | .16 | -1.03, -0.39 | 19.29 | <.001 | 0.49 |
| A-Level equivalent | | -0.44 | .20 | -0.83, -0.06 | 5.12 | .024 | 0.64 |
| Non-White Dummy Indicator | | 0.49 | .17 | 0.16, 0.82 | 8.26 | .004 | 1.64 |
| Non-Pakistani Dummy Indicator | | -0.26 | .16 | -0.57, 0.06 | 2.56 | .109 | 0.77 |
| Maternal Age | | 0.00 | .00 | 0.00, 0.00 | 2.26 | .133 | 1.00 |
| Cord LDL | | -1.31 | .48 | -2.25, -0.37 | 7.39 | .007 | 0.27 |
|  | **Triglycerides** | | | | | |  |
|  | Model of Self-Awareness | | | | | |  |
| Male | | -0.56 | .12 | -0.79, 0.34 | 23.77 | <.001 | 0.57 |
| <5 GCSE equivalent | | -0.88 | .17 | -1.201, -0.55 | 27.12 | <.001 | 0.42 |
| 5 GCSE equivalent | | -0.47 | .16 | -0.78, -0.17 | 9.22 | .002 | 0.62 |
| A-Level equivalent | | -0.28 | .19 | -0.65, 0.09 | 2.21 | .137 | 0.76 |
| Non-White Dummy Indicator | | 0.46 | .16 | 0.14, 0.78 | 7.72 | .005 | 1.58 |
| Non-Pakistani Dummy Indicator | | -0.36 | .16 | -0.66, -0.05 | 5.25 | .022 | 0.70 |
| Maternal Age | | 0.00 | .00 | 0.00, 0.00 | 1.35 | .245 | 1.00 |
| Cord triglyceride | | -0.55 | .22 | -0.98, -0.13 | 6.42 | .011 | 0.58 |
|  | Model of Emotional Regulation | | | | | |  |
| Male | | -0.90 | .12 | -1.13, -0.66 | 54.96 | <.001 | 0.40 |
| <5 GCSE equivalent | | -1.12 | .17 | -1.46, -0.78 | 42.00 | <.001 | 0.33 |
| 5 GCSE equivalent | | -0.70 | .16 | -1.01, -0.39 | 19.25 | <.001 | 0.50 |
| A-Level equivalent | | -0.44 | .19 | -0.81, -0.06 | 5.11 | .024 | 0.65 |
| Non-White Dummy Indicator | | 0.35 | .17 | 0.02, 0.68 | 4.36 | .037 | 1.42 |
| Non-Pakistani Dummy Indicator | | -0.33 | .16 | -0.64, -0.03 | 4.48 | .034 | 0.72 |
| Maternal Age | | 0.00 | .00 | 0.00, 0.00 | 4.65 | .031 | 1.00 |
| Cord triglyceride | | -0.53 | .22 | -0.96, -0.11 | 5.99 | .014 | 0.59 |
|  | Model of Interpersonal relationship | | | | | |  |
| Male | | -0.75 | .12 | -0.99, -0.52 | 38.76 | <.001 | 0.47 |
| <5 GCSE equivalent | | -1.11 | .18 | -1.45, -0.77 | 40.10 | <.001 | 0.33 |
| 5 GCSE equivalent | | -0.71 | .16 | -1.03, -0.39 | 19.29 | <.001 | 0.49 |
| A-Level equivalent | | -0.44 | .20 | -0.83, -0.06 | 5.11 | .024 | 0.62 |
| Non-White Dummy Indicator | | 0.49 | .17 | 0.16, 0.82 | 8.28 | .004 | 1.63 |
| Non-Pakistani Dummy Indicator | | -0.26 | .16 | -0.57, 0.06 | 2.57 | .109 | 0.77 |
| Maternal Age | | 0.00 | .00 | 0.00, 0.00 | 2.24 | .134 | 1.00 |
| Cord triglyceride | | -0.60 | .22 | -1.03, -0.17 | 7.57 | .006 | 0.55 |

*Note.* Parameter estimates for maternal education variables are given relative to mothers with the highest educational attainment (graduate schooling); estimates for ethnic background are presented relative to membership in the referent group (i.e., the Non-White dummy indicator reflects relative likelihood of being in a higher psychosocial competence category compared to children who are White British). Each model was run separately, resulting in 9 primary models. All lipid estimates are presented for markers in their raw units.

*Supplemental Table 2: Multiple Linear Regression Results with Unweighted Composite Variables*

| *Model/Predictor* | *R* | *R2* | *F* | *sig* | *B* | *SE* | *t* | *sig* |
| --- | --- | --- | --- | --- | --- | --- | --- | --- |
| Psychosocial Composite | .30 | .09 | 22.97 | <.001 |  |  |  |  |
| Child Sex |  |  |  |  | 0.32 | 0.05 | 6.55 | <.001 |
| Non-White Dummy Indicator |  |  |  |  | -0.20 | 0.07 | -2.89 | .004 |
| Non-Pakistani Dummy Indicator |  |  |  |  | 0.14 | 0.07 | 2.21 | .033 |
| Mother Education |  |  |  |  | 0.15 | 0.02 | 6.70 | <.001 |
| Mother Age |  |  |  |  | 0.00 | .00 | 1.71 | .088 |
| Lipid Composite |  |  |  |  | -0.10 | 0.03 | -3.46 | .001 |

*Note.* Psychosocial Composite is the sum of standardized ratings across each Early Years Foundation Stage Profile domain. Lipid Composite is the sum of standardized VLDL, triglycerides, and HDL (with HDL reverse scored). Analyses using composite variables derived through principal component analysis yielded similar findings as the unweighted sum composites.
